# Supplementary material for: Rediscovering copper-based catalysts for intramolecular carbon–hydrogen bond functionalization by carbene insertion
Source: Royal Society of Chemistry journal article supplement (doi:10.1039/b911589g), 2009-01-01
Supplement: b911589g.pdf [file b911589g.pdf]

# Electronic Supporting Information

## for

# Rediscovering copper-based catalysts for the intramolecular carbon-hydrogen bond functionalization by carbene insertion

Carmen Martín, Tomás R. Belderrain\* and Pedro J. Pérez\*

*Laboratorio de Catálisis Homogénea, Departamento de Química y Ciencia de los  
Materiales, Unidad Asociada al CSIC, Campus de El Carmen s/n, Universidad de  
Huelva, 21007-Huelva, Spain*

[perez@dqcm.uhu.es](mailto:perez@dqcm.uhu.es); [trodri@dqcm.uhu.es](mailto:trodri@dqcm.uhu.es)

## Table of Contents

|                                                  |        |
|--------------------------------------------------|--------|
| General methods and experimental procedures..... | S2     |
| Data of compounds.....                           | S3-S5  |
| References.....                                  | S6     |
| NMR spectra of compounds.....                    | S7-S12 |

**General Methods.** All manipulations were carried out under a nitrogen atmosphere using standard Schlenk techniques. Ethyl diazoacetate and *tert*-butyl diazoacetate were purchased and employed without further purification. The complexes [Tp<sup>X</sup>Cu]<sup>1a-d</sup> and diazocompounds<sup>2</sup> were prepared according to literature procedures. Reagents and solvents were dried and degassed before use. NMR spectra were recorded on a 400 MHz spectrometer (<sup>13</sup>C NMR at 100MHz) using CDCl<sub>3</sub> as the solvent.

**General Catalytic Procedure for the diazocompounds decomposition.** A solution of the corresponding diazocompounds (1mmol) in 20mL of CH<sub>2</sub>Cl<sub>2</sub> was added in one portion or with the aid of a syringe pump over the desired time to a solution of Tp<sup>X</sup>Cu (0.0125mmol) in 20mL of CH<sub>2</sub>Cl<sub>2</sub>. After addition, the consumption of the diazocompound (diazoacetates or diazoacetamides) was monitored by IR. When no diazo was observed, volatiles were removed under vacuum and the reaction crude was analyzed by <sup>1</sup>H NMR spectroscopy. All the products have been previously described and their identification came straight forward from comparison with data reported.<sup>3-6</sup> Conversion were determined by <sup>1</sup>H NMR spectroscopy using 1,4-dimethoxybenzene as an internal standard. Isolated yield of representative examples were obtained upon purification of products by column chromatography with neutral silica gel or basic alumina following previously describes reported.<sup>6</sup>

## Spectroscopic data for compounds 5-11

### Data of Compounds:

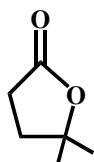

#### 5,5-dimethyl-dihydrofuran-2-one (5)

IR (NaCl) 1761  $\text{cm}^{-1}$ ;  $^1\text{H}$  NMR (400 MHz,  $\text{CDCl}_3$ )  $\delta$  2.6 (t,  $J = 8.3$  Hz, 2H), 2.0 (t,  $J = 8.3$  Hz, 2H), 1.4 (s, 1H);  $^{13}\text{C}$  NMR (100 MHz,  $\text{CDCl}_3$ )  $\delta$  27.7, 29.3, 35.6, 84.5, 176.7; MS 115 (M+1) 97(30), 69(8).

Data are in agreement with those reported in the literature.<sup>3</sup>

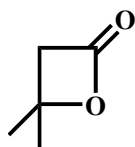

#### 4,4-dimethyloxetan-2-one (6)

IR (NaCl) 1682  $\text{cm}^{-1}$ ;  $^1\text{H}$  NMR (400 MHz,  $\text{CDCl}_3$ )  $\delta$  3.18 (s, 2H), 1.52 (s, 6H);  $^{13}\text{C}$  NMR (100 MHz,  $\text{CDCl}_3$ )  $\delta$  26.8, 48.9, 76.8, 168.2; MS 101 (M+1) 85(31), 73(61).

Data are in agreement with those reported in the literature<sup>4</sup>

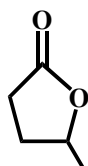

#### 5-methyl-dihydrofuran-2-one (7)

IR (NaCl) 1770  $\text{cm}^{-1}$ ;  $^1\text{H}$  NMR (400 MHz,  $\text{CDCl}_3$ )  $\delta$  4.6 (tq,  $J = 7.8, 6.2$  Hz, 1H), 2.6-2.5 (m, 2H), 2.5-2.3 (m, 1H), 1.9-1.7 (m, 1H), 1.4 (d,  $J = 6.2$  Hz, 3H);  $^{13}\text{C}$  NMR (100 MHz,  $\text{CDCl}_3$ )  $\delta$  20.8, 29.1, 29.8, 78.5, 178.5; MS 101 (M+1) 83(30), 56(8).

Data are in agreement with those reported in the literature<sup>3</sup>

**1-ethyl-4-methylazetidin-2-one (8)**

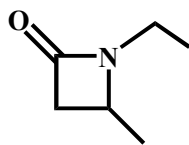

IR (NaCl): 1760  $\text{cm}^{-1}$ ;  $^1\text{H}$  NMR (400 MHz,  $\text{CDCl}_3$ )  $\delta$  3.56 (m, 1H), 3.33 (m,  $J = 2\text{ Hz}$ ), 2.95 (m, 1H), 2.88 (dd,  $J = 14.3, 4.8\text{ Hz}$ , 1H), 2.35 (dd,  $J = 14.3, 2.1\text{ Hz}$ , 1H), 1.23 (d,  $J = 6.1\text{ Hz}$ , 3H), 1.1 (t,  $J = 7.2\text{ Hz}$ , 3H);  $^{13}\text{C}$  NMR (100 MHz,  $\text{CDCl}_3$ )  $\delta$  13.5, 19.1, 35.1, 44.0, 46.9, 166.2; MS 114 (M+1), 100(20), 86(5).

Data are in agreement with those reported in the literature.<sup>5</sup>

**1-ethylpyrrolidin-2-one (9)**

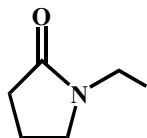

IR (NaCl): 1688  $\text{cm}^{-1}$ ;  $^1\text{H}$  NMR (400 MHz,  $\text{CDCl}_3$ )  $\delta$  3.32 (m, 2H), 3.25 (q,  $J = 7.6\text{ Hz}$ , 2H), 2.31 (t,  $J = 8.2\text{ Hz}$ , 2H), 1.95 (m, 2H), 1.05 (t,  $J = 7.4\text{ Hz}$ , 3H);  $^{13}\text{C}$  NMR (100 MHz,  $\text{CDCl}_3$ )  $\delta$  12.4, 17.8, 31.1, 37.0, 46.5, 174.7; MS 114 (M+1) 98(35), 70(30).

Data are in agreement with those reported in the literature.<sup>6</sup>

**1-isopropyl-4,4-dimethylazetidin-2-one (10)**

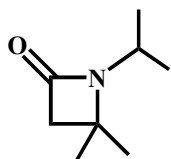

IR (NaCl): 1745  $\text{cm}^{-1}$ ;  $^1\text{H}$  NMR (400 MHz,  $\text{CDCl}_3$ )  $\delta$  3.58 (hept,  $J = 6.4\text{ Hz}$ , 1H), 2.66 (s, 2H), 1.41 (s, 6H), 1.31 (d,  $J = 6.9\text{ Hz}$ , 6H);  $^{13}\text{C}$  NMR (100 MHz,  $\text{CDCl}_3$ )  $\delta$  21.8, 26.3, 44.5, 50.3, 56.1, 166.0; MS 142 (M+1) 126(12), 84(55).

Data are in agreement with those reported in the literature.<sup>7</sup>

**1-isopropyl-5-methylpyrrolidin-2-one (11)**

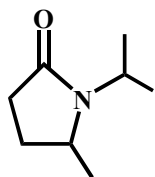

IR (NaCl): 1680  $\text{cm}^{-1}$ ;  $^1\text{H}$  NMR (400 MHz,  $\text{CDCl}_3$ )  $\delta$  4.22-4.10 (m, 1H), 4.09-4.00 (m, 1H), 2.52-2.35 (m, 2H), 2.15-2.03 (m 2H), 1.26-1.15 (9H);  $^{13}\text{C}$  NMR (100 MHz,  $\text{CDCl}_3$ )  $\delta$  19.7, 21.8, 22.5, 27.3, 30.5, 44.3, 53.2, 174.8; MS 142 (M+1)126(62), 84(15).

Data are in agreement with those reported in the literature<sup>7</sup>

## References

1. (a)  $\text{Tp}^{\text{X}}\text{Cu} = \text{Tp}^*\text{Cu}$ : C. Mealli, C. S. Arcus, J. L. Wilkinson, T. J. Marks and J.A. Ibers, *J. Am. Chem. Soc.*, 1976, **98**, 711-718. (b)  $\text{Tp}^{\text{Ms}}\text{Cu}$ : M. C. Schneider, S. M. Carrier, C. E. Ruggiero, V. G. Young and W. B. Tolman, *J. Am. Chem. Soc.*, 1998, **120**, 11408-11418. (c)  $\text{Tp}^{\text{Br}^3}\text{Cu}$ : A. Caballero, M. M. Diaz-Requejo, T. R. Belderrain, M. C. Nicasio and P. J. Pérez; *J. Am. Chem. Soc.*, 2003, **125**, 1446. d)  $\text{Tp}^{\text{Cy},4\text{Br}}\text{Cu}$ : M. A. Mairena, J. Urbano, J. Carbajo, J. J. Maraver, E. Alvarez, M. M. Diaz-Requejo and P. J. Pérez, *Inorg. Chem.*, **2007**, *46*, 7428-7435.
2. Diazoacetates and diazoacetamides were prepared as described in: T. Toma, J. Shimokawa and T. Fukuyama, *Org. Lett.* 2007, **9**, 3195-3197.
3. L. Coulombel and E. Duñach, *Synth. Commun.*, 2005, **35**, 153-160.
4. J. K. Crandall, W. H. Machleder and S. A. Sojka, *J. Org. Chem.*, 1973, **38**, 1149-1154.
5. R. R. Rando, *J. Am. Chem. Soc.*, 1970, **92**, 6706-6797.
6. G. Markus, S. Buck, L. Schäffler and G. Maas, *Adv. Synth. Catal.*, 2006, **348**, 2203-2211.
7. M. P. Doyle, S. M. Oon, F. R. Heide and C. B. Brown, *Bioorg. Med. Chem. Lett.* 1993, **3**, 2409-2414.

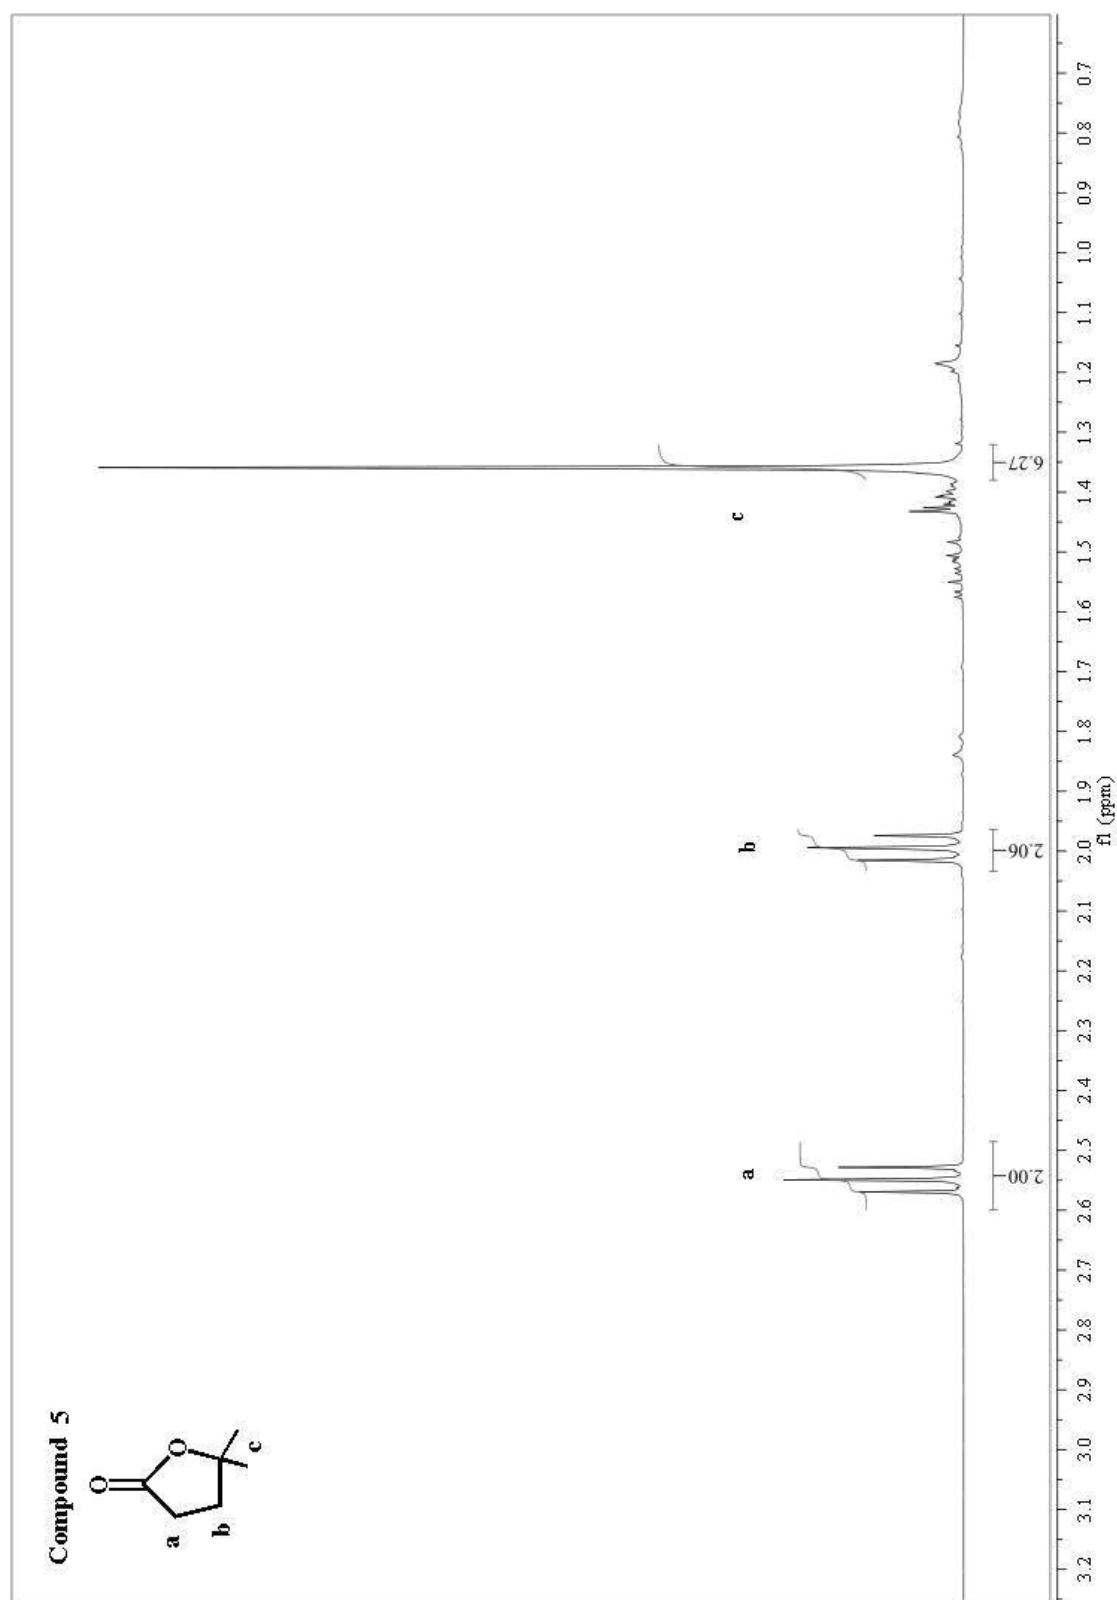

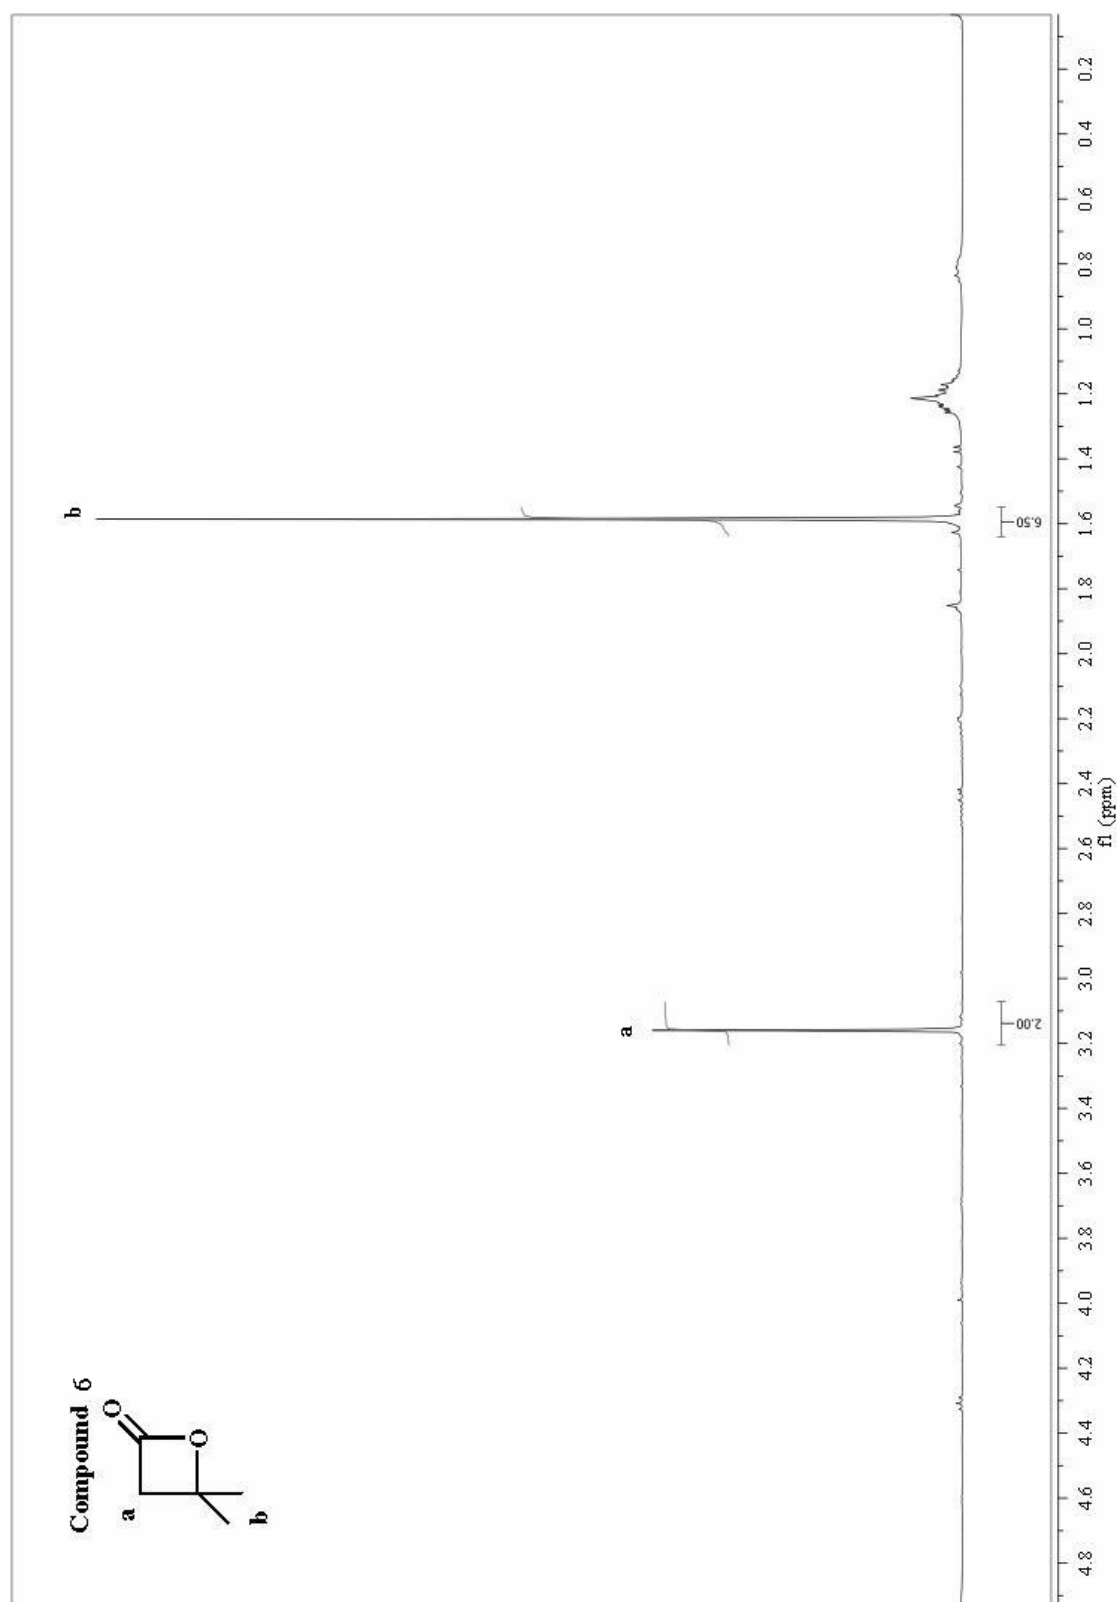

**Figure 2.-** <sup>1</sup>H NMR spectrum of the major product obtained from the decomposition of isopropyl diazoacetate in the presence of Tp<sup>Ms</sup>Cu as catalyst.

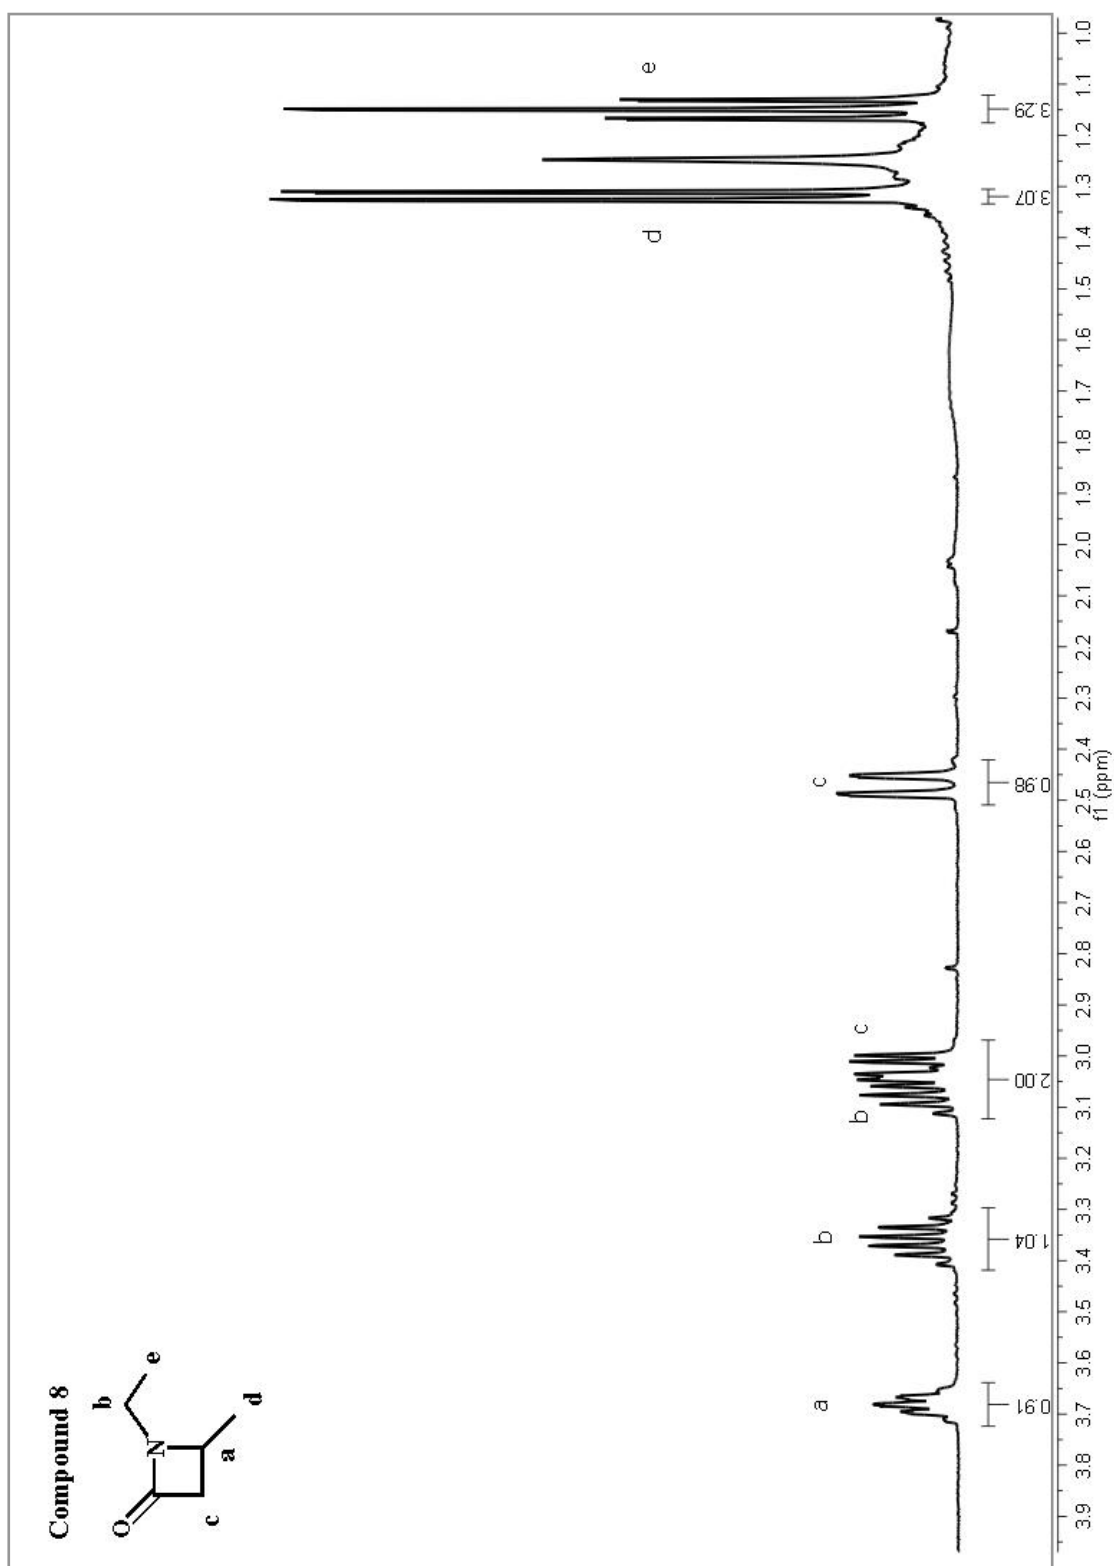

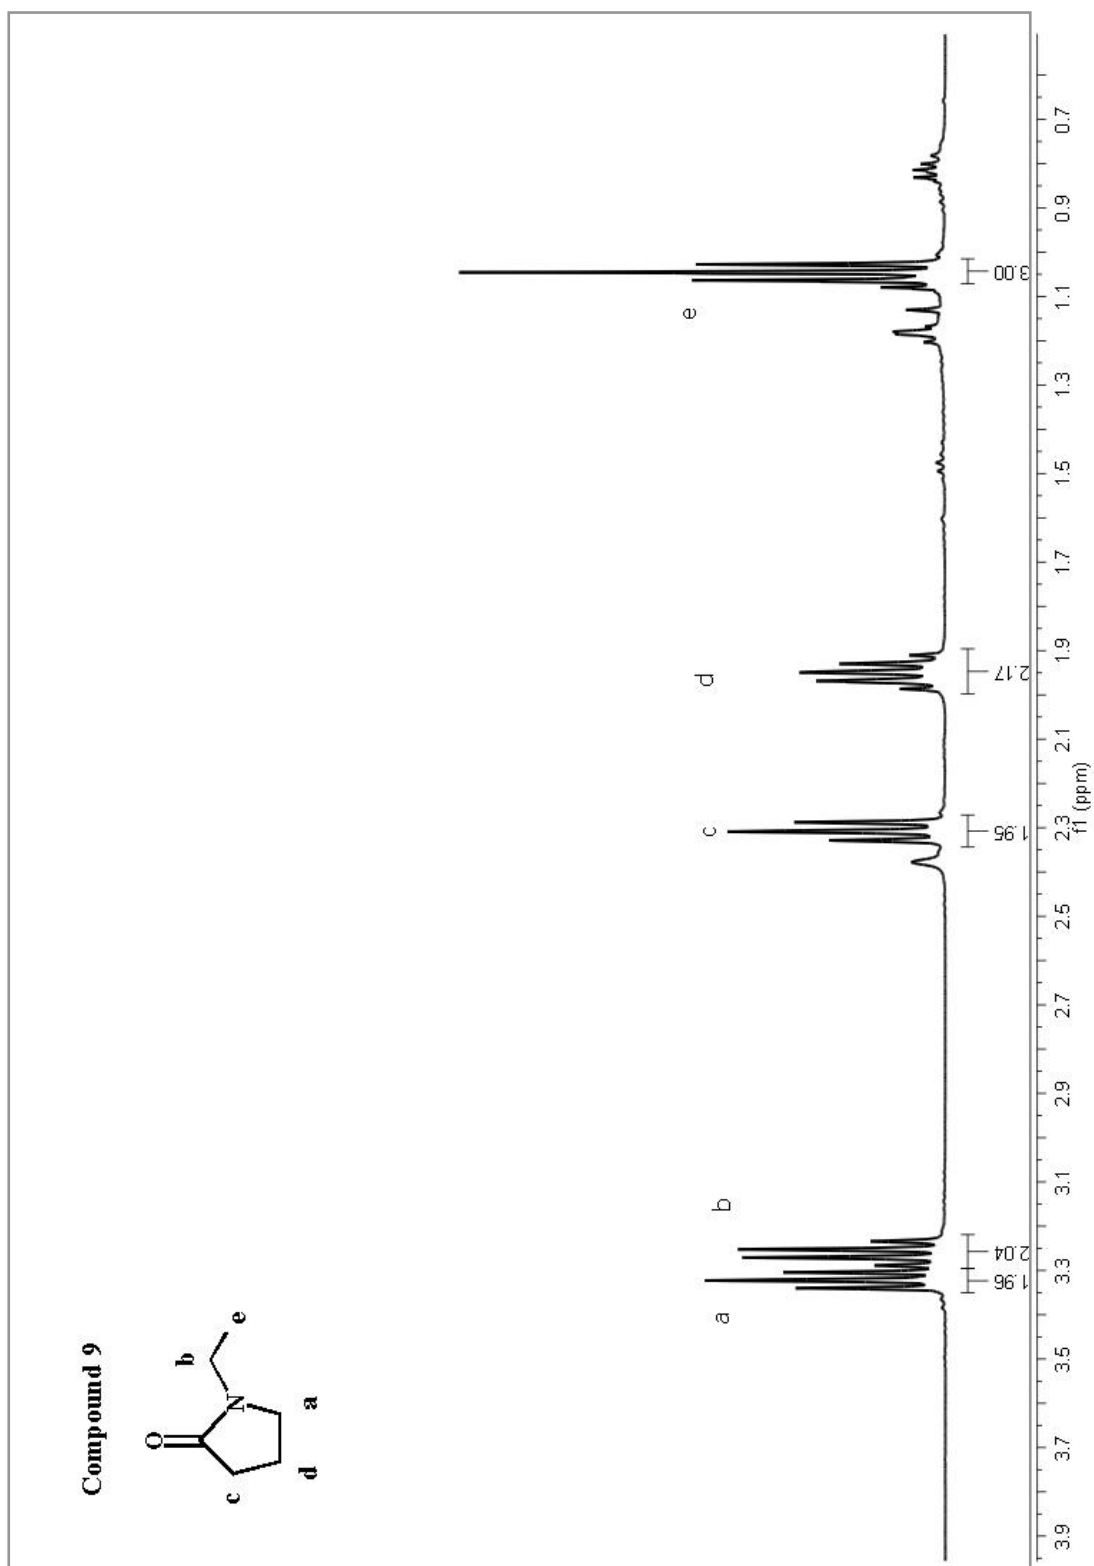

**Figure 4.-** <sup>1</sup>H NMR spectrum of minor product obtained from the decomposition of the diisopropyl diazoacetamides in the presence of Tp<sup>Br</sup>Cu as catalyst.

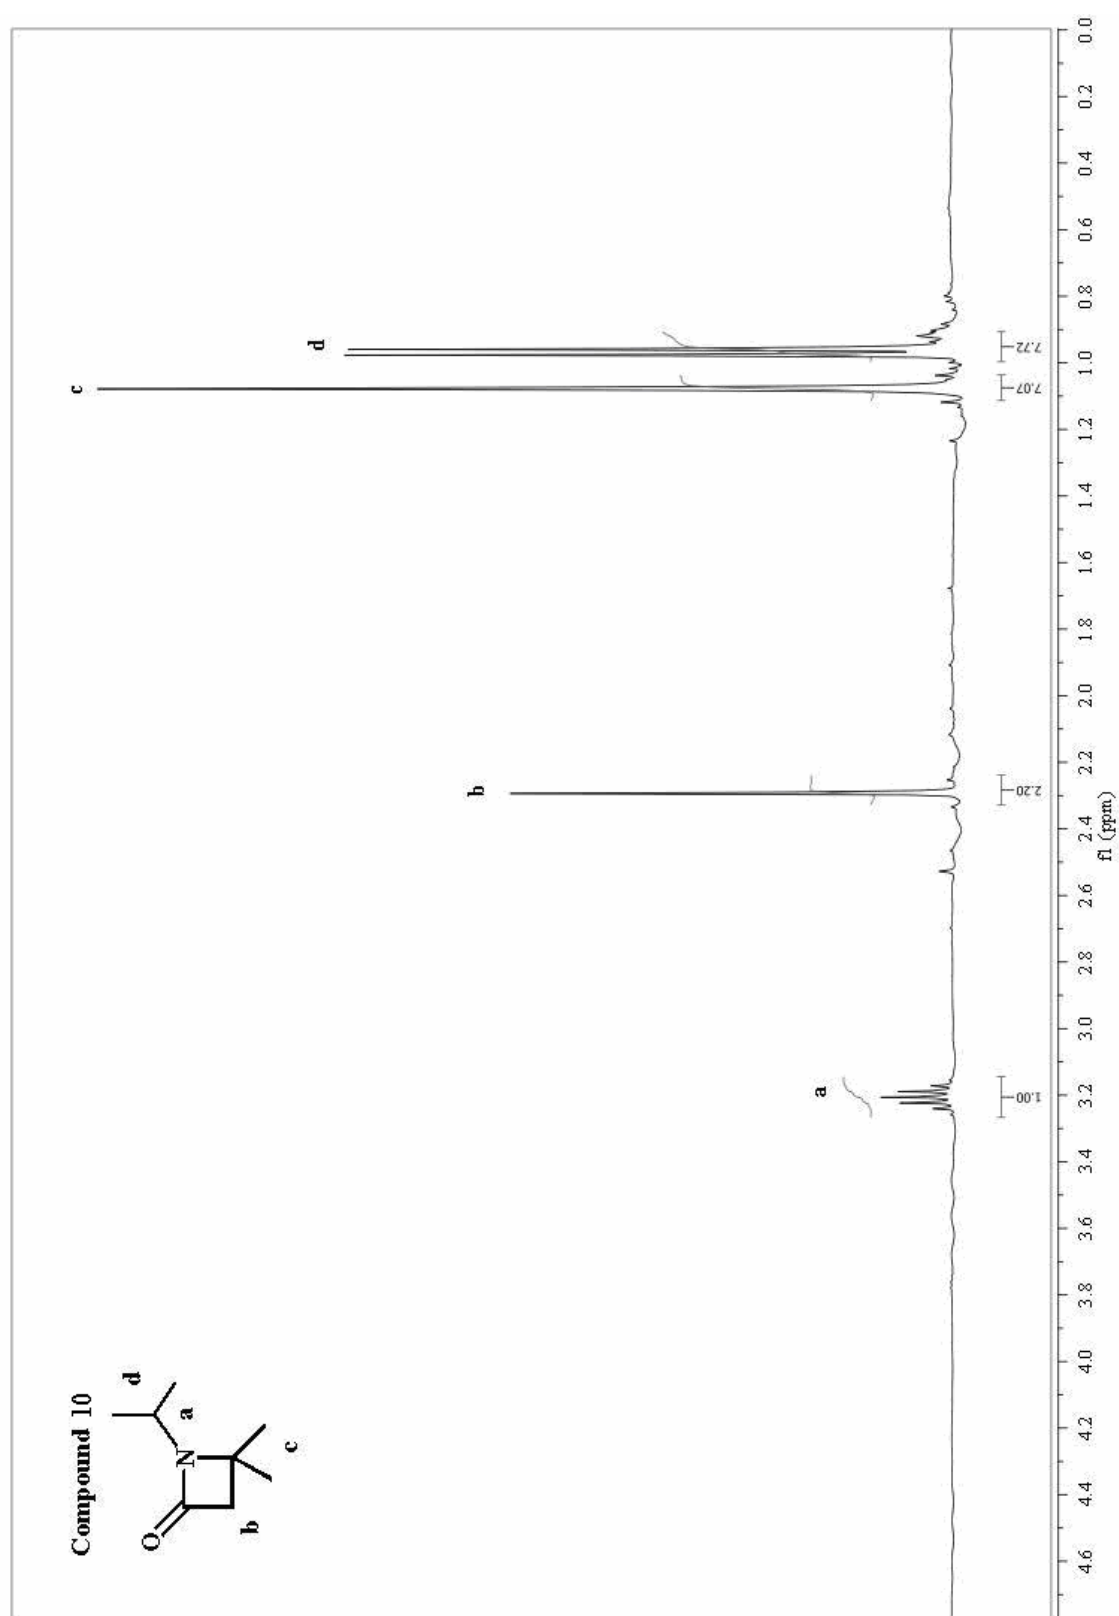

**Figure 5.-**  $^1\text{H}$  NMR spectrum of major product obtained from the decomposition of the diisopropyl diazoacetamides in the presence of  $\text{Tp}^{\text{Br}}\text{Cu}$  as catalyst.

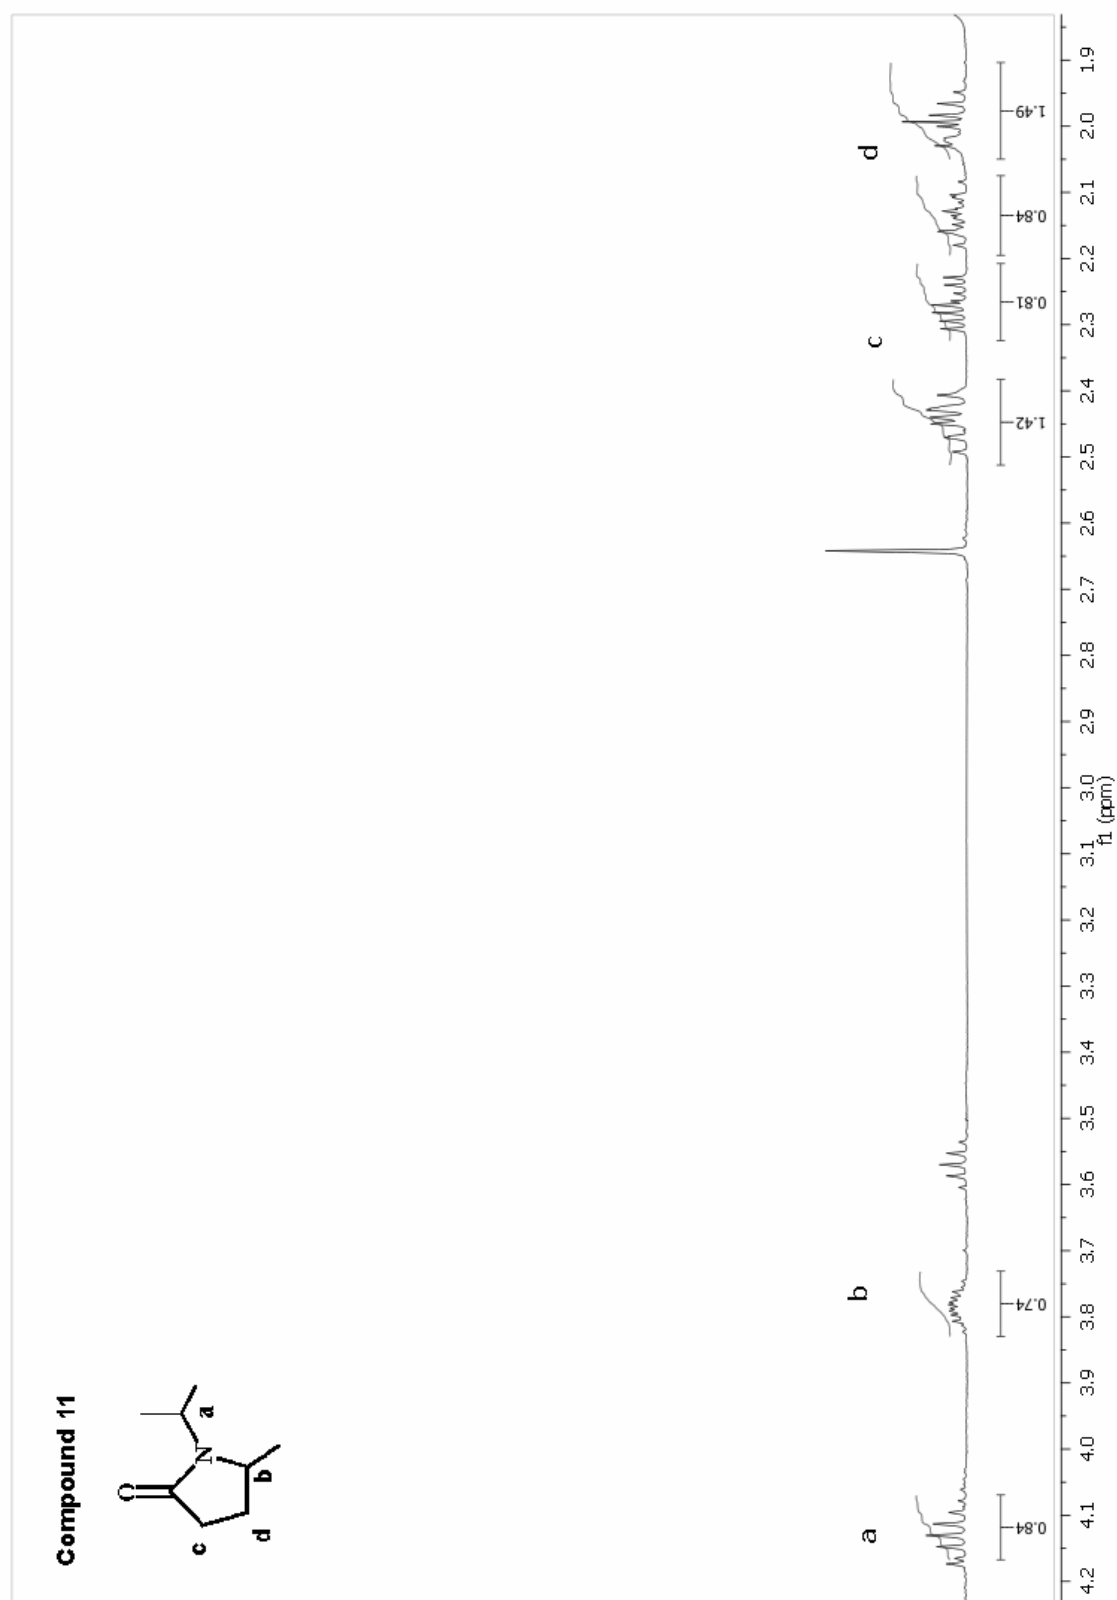

**Figure 6.-**  $^1\text{H}$  NMR spectrum of the minor products obtained from the decomposition of the diisopropyl diazocetamides in the presence of  $\text{Tp}^{\text{Br}}\text{Cu}$  as catalyst.
